# Supplementary material for: Triglyceride-glucose index and the risk of stroke and its subtypes in the general population: an 11-year follow-up
Source: PubMed Central journal article supplement (PMC7893902; doi:10.1186/s12933-021-01238-1), 2021-02-18
Supplement: 12933_2021_1238_MOESM1_ESM.pdf [file 12933_2021_1238_MOESM1_ESM.pdf]

Participants completed the baseline survey in the Kailuan Study  
(n=101510)

```
graph TD; A[Participants completed the baseline survey in the Kailuan Study (n=101510)] --> B[Participants free of stroke (n=98939)]; A --> C[Participants with a history of stroke at baseline (n=2571)]; B --> D[Participants included in this analysis (n=97653)]; B --> E[Participants without fasting triglyceride or fasting glucose at baseline (n=1286)];
```

Participants with a history of stroke at baseline  
(n=2571)

Participants free of stroke (n=98939)

Participants without fasting triglyceride or  
fasting glucose at baseline (n=1286)

Participants included in this analysis (n=97653)
